# Supplementary material
Source: PubMed Central journal article supplement (PMC2758772)

# AD

## A

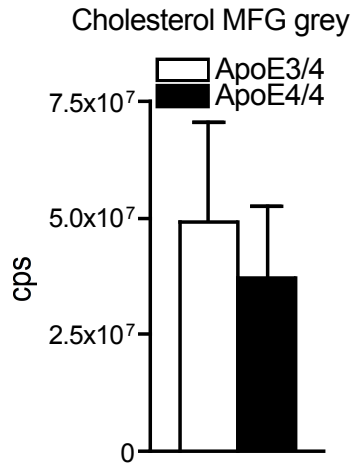

## B

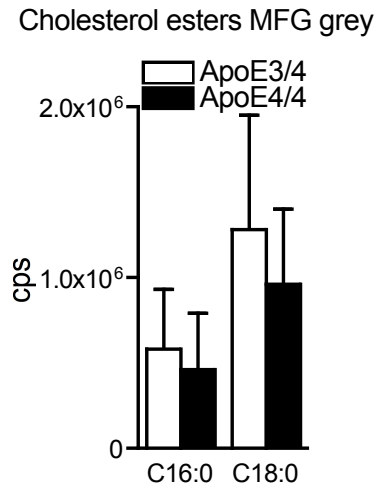

## C

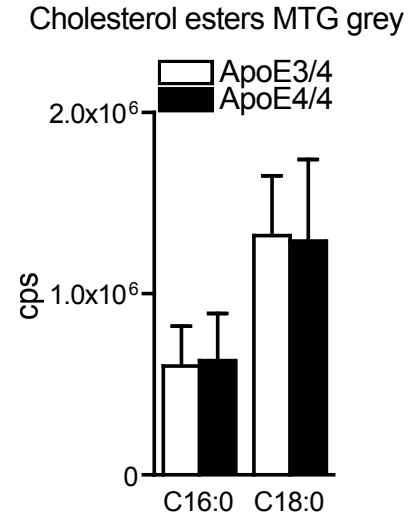

# Normal

## D

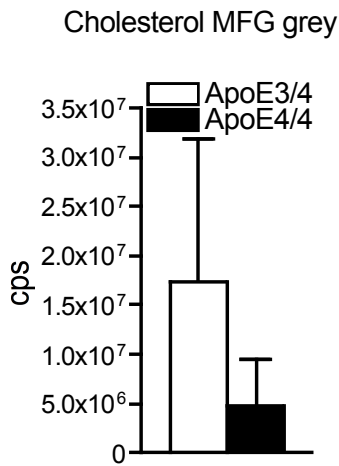

## E

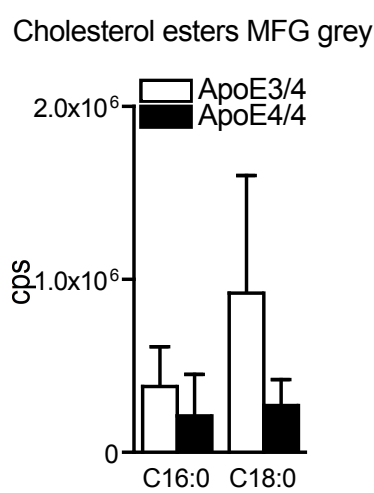

## F

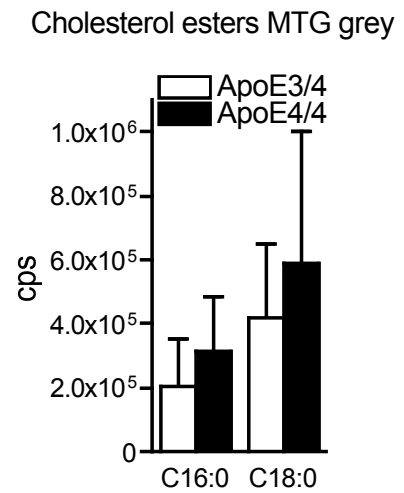

# AD

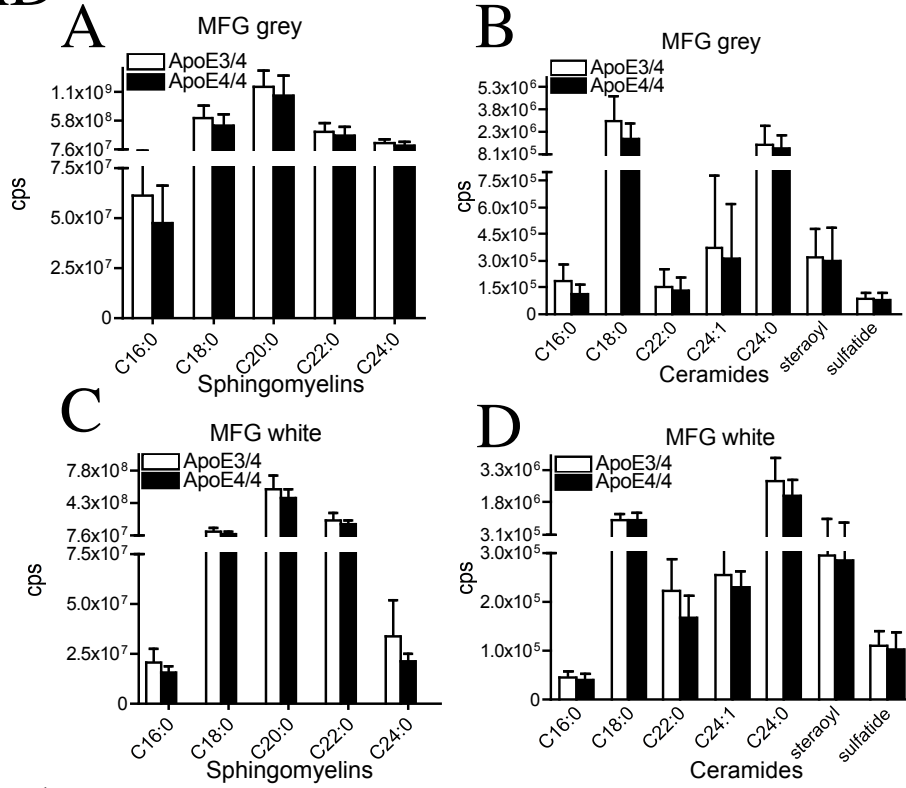

# Normal

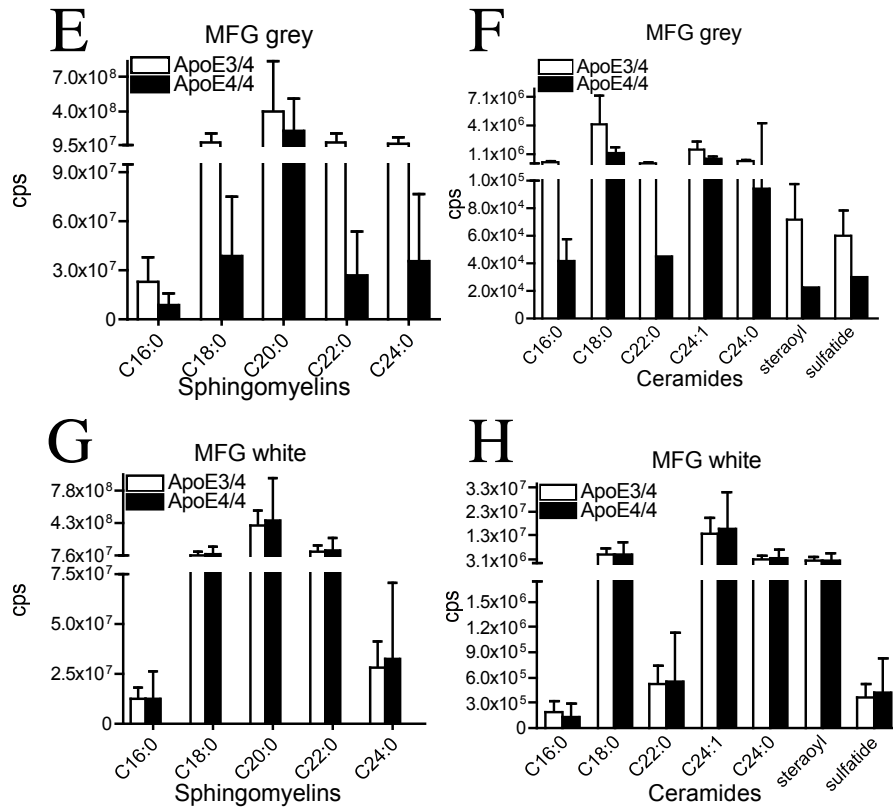

# AD

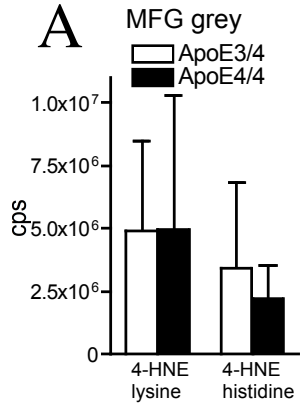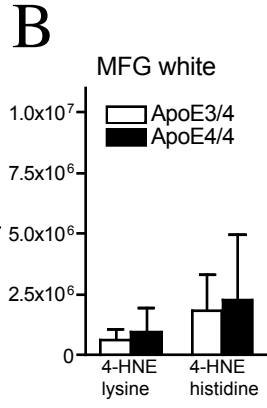

# Normal

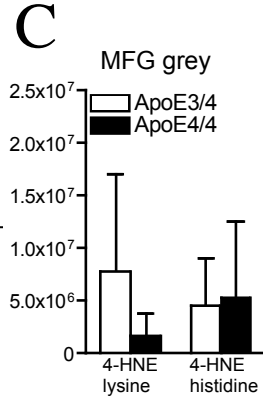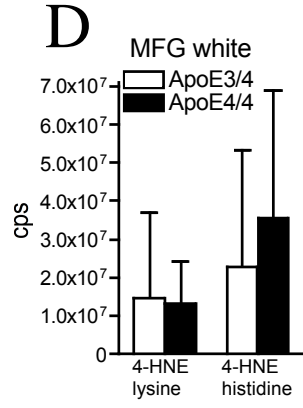

Supplement: NIHMS104784-supplement-01.pdf [file NIHMS104784-supplement-01.pdf]
